# Supplementary material for: Potential Anti-Metastatic Role of the Novel miR-CT3 in Tumor Angiogenesis and Osteosarcoma Invasion
Source: MDPI journal article supplement (doi:10.3390/ijms23020705), 2022-01-09
Supplement: s1 [file s1]

**Table S1.** List of gene primers used to study gene expression profiling. Their expression was normalized to the  $\beta$ -actin

| Gene                 | Forward primer sequence  | Reverse primer sequence  |
|----------------------|--------------------------|--------------------------|
| human VEGF           | CGAGGGCCTGGAGTGTGT       | CGCATAATCTGCATGGTGATG    |
| human MMP9           | CGCTACCACCTCGAACTTTG     | GCCATTCACGTCGTCCTTAT     |
| human IL-8           | GAATGGGTTTGCTAGAATGTGATA | CAGACTAGGGTTGCCAGATTTAAC |
| human $\beta$ -actin | AGGCACCAGGGCGTGAT        | GCCCACATAGGAATCCTTCTGAC  |
