# Supplementary material for: Potential Anti-Metastatic Role of the Novel miR-CT3 in Tumor Angiogenesis and Osteosarcoma Invasion
Source: MDPI journal article supplement (doi:10.3390/ijms23020705), 2022-01-09
Supplement: s1 [file s1]

A

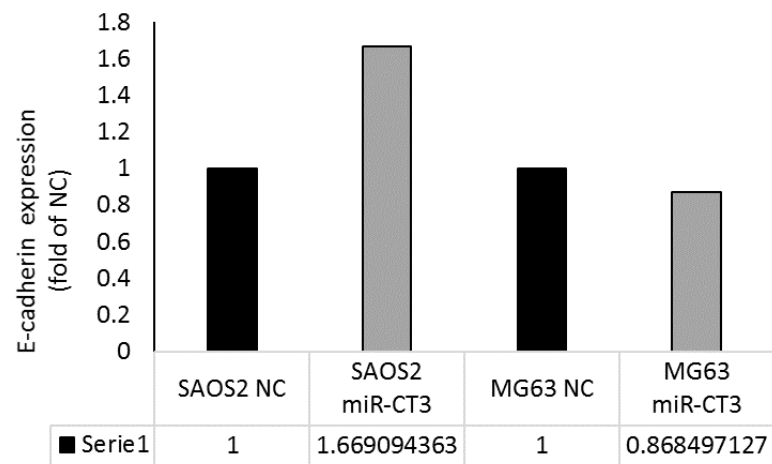

B

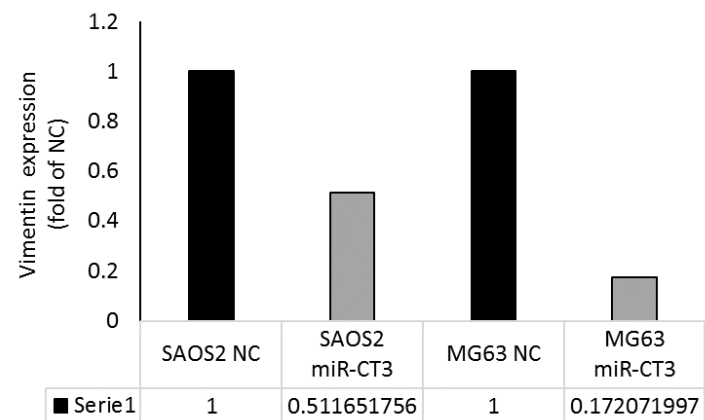

C

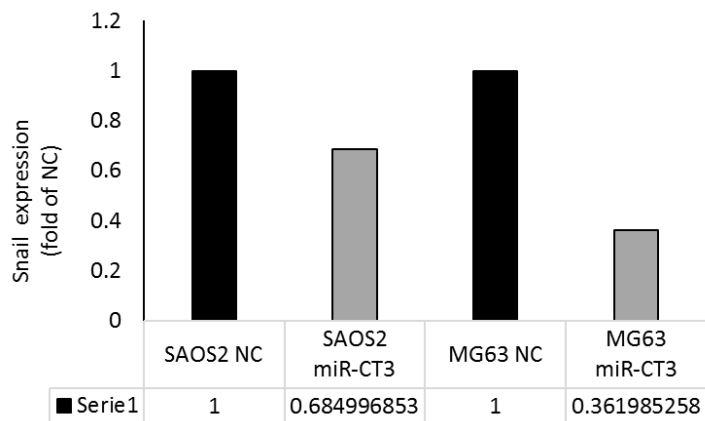

D

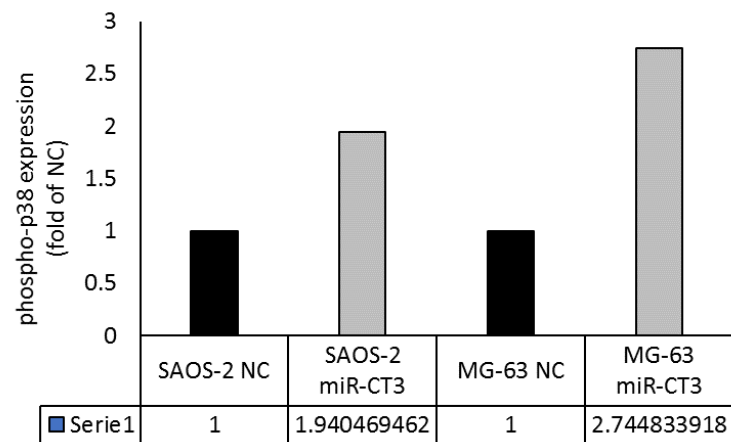

E

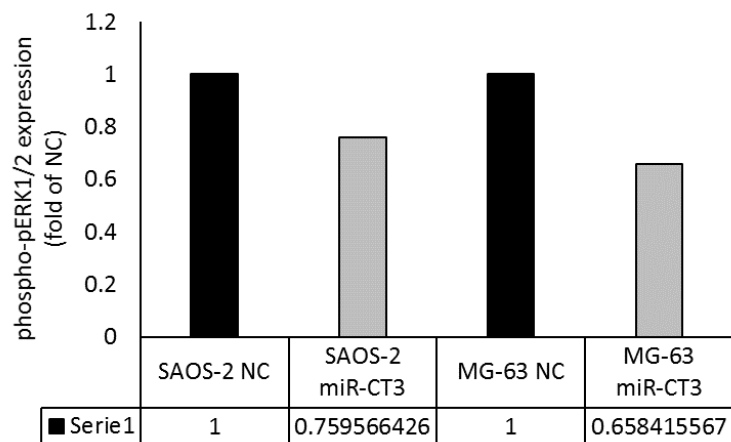

## Figure S2

### Densitometry analysis of western blotting of Figure 6A-B-C

A. Densitometry values (normalized to  $\alpha$ -tubulin) of E-cadherin. B. Densitometry values (normalized to  $\alpha$ -tubulin) of Vimentin. C. Densitometry values (normalized to  $\alpha$ -tubulin) of Snail. D. Densitometry values (normalized to p38 total) of phospho-p38. E. Densitometry values (normalized to pERK1/2 total) of phospho-pERK1/2.

Figure 6A: WB

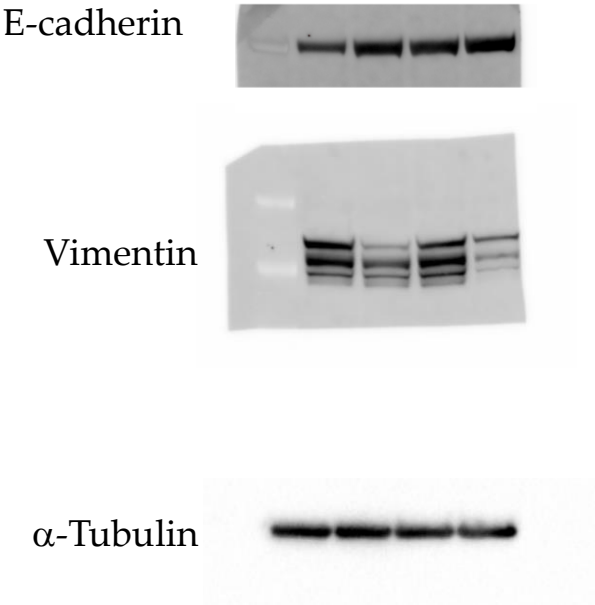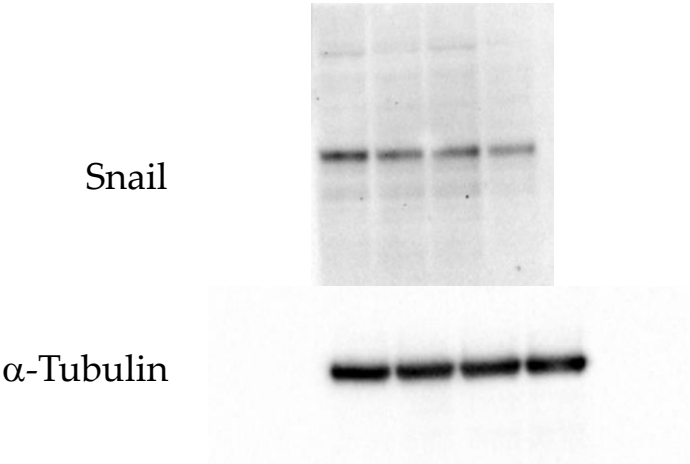

Figure 6B: WB phospho- and total-p38 and  $\alpha$ -tubulin

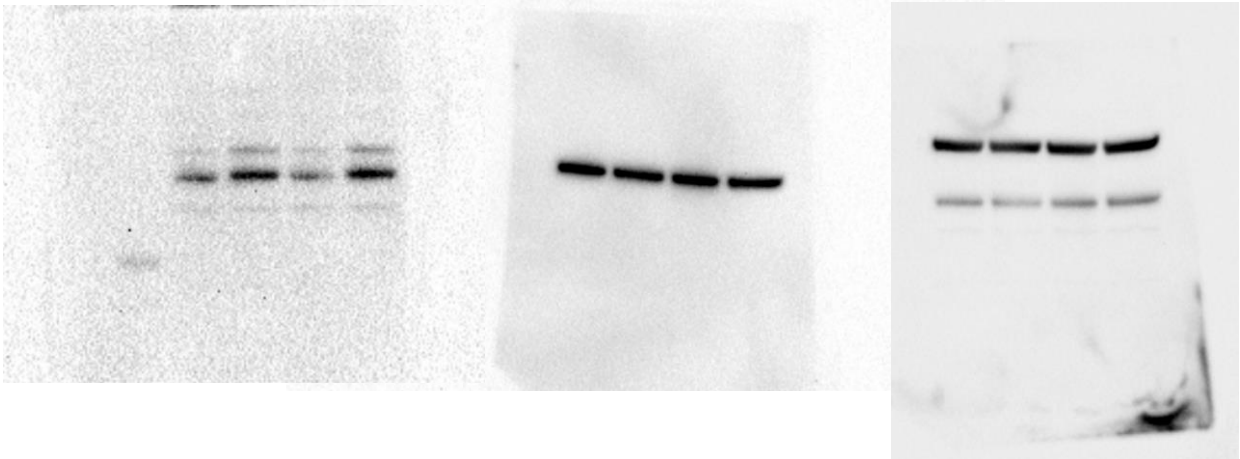

Figure 6C: WB phospho- and total-p42/44 ERK and GAPDH

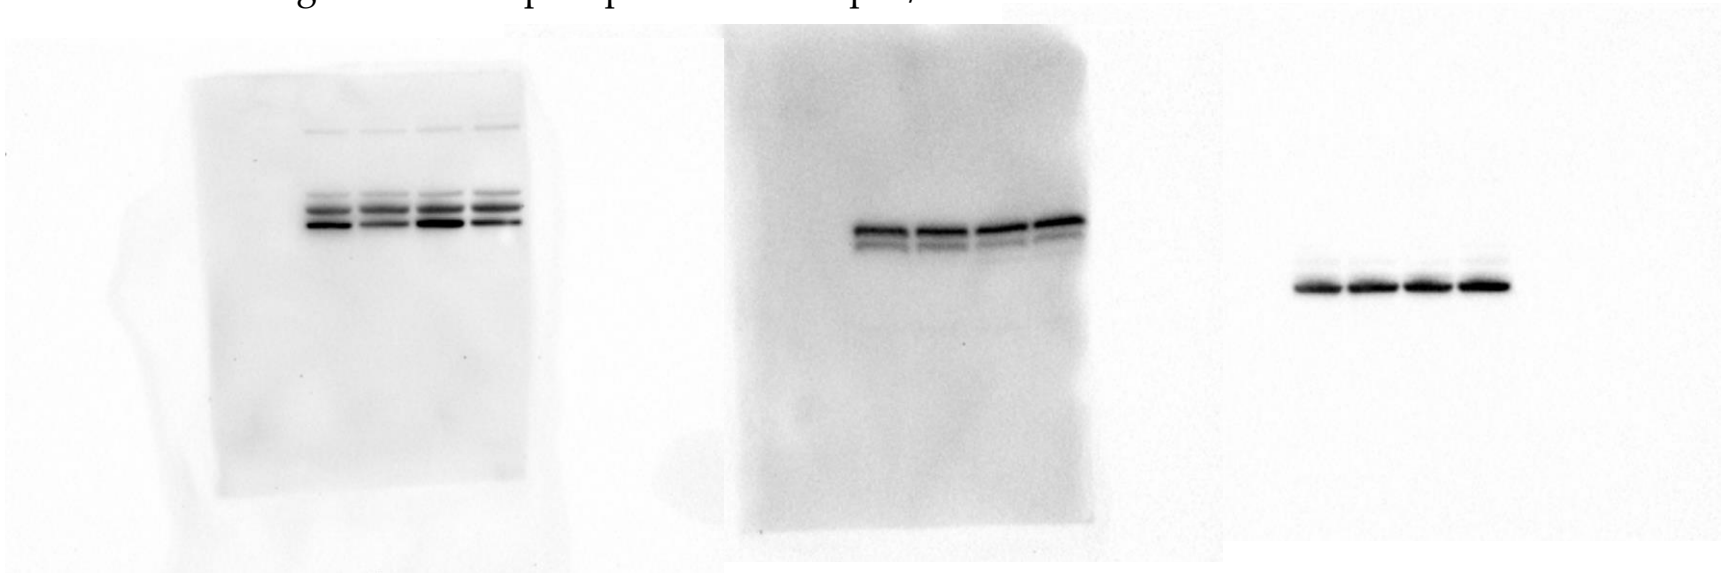

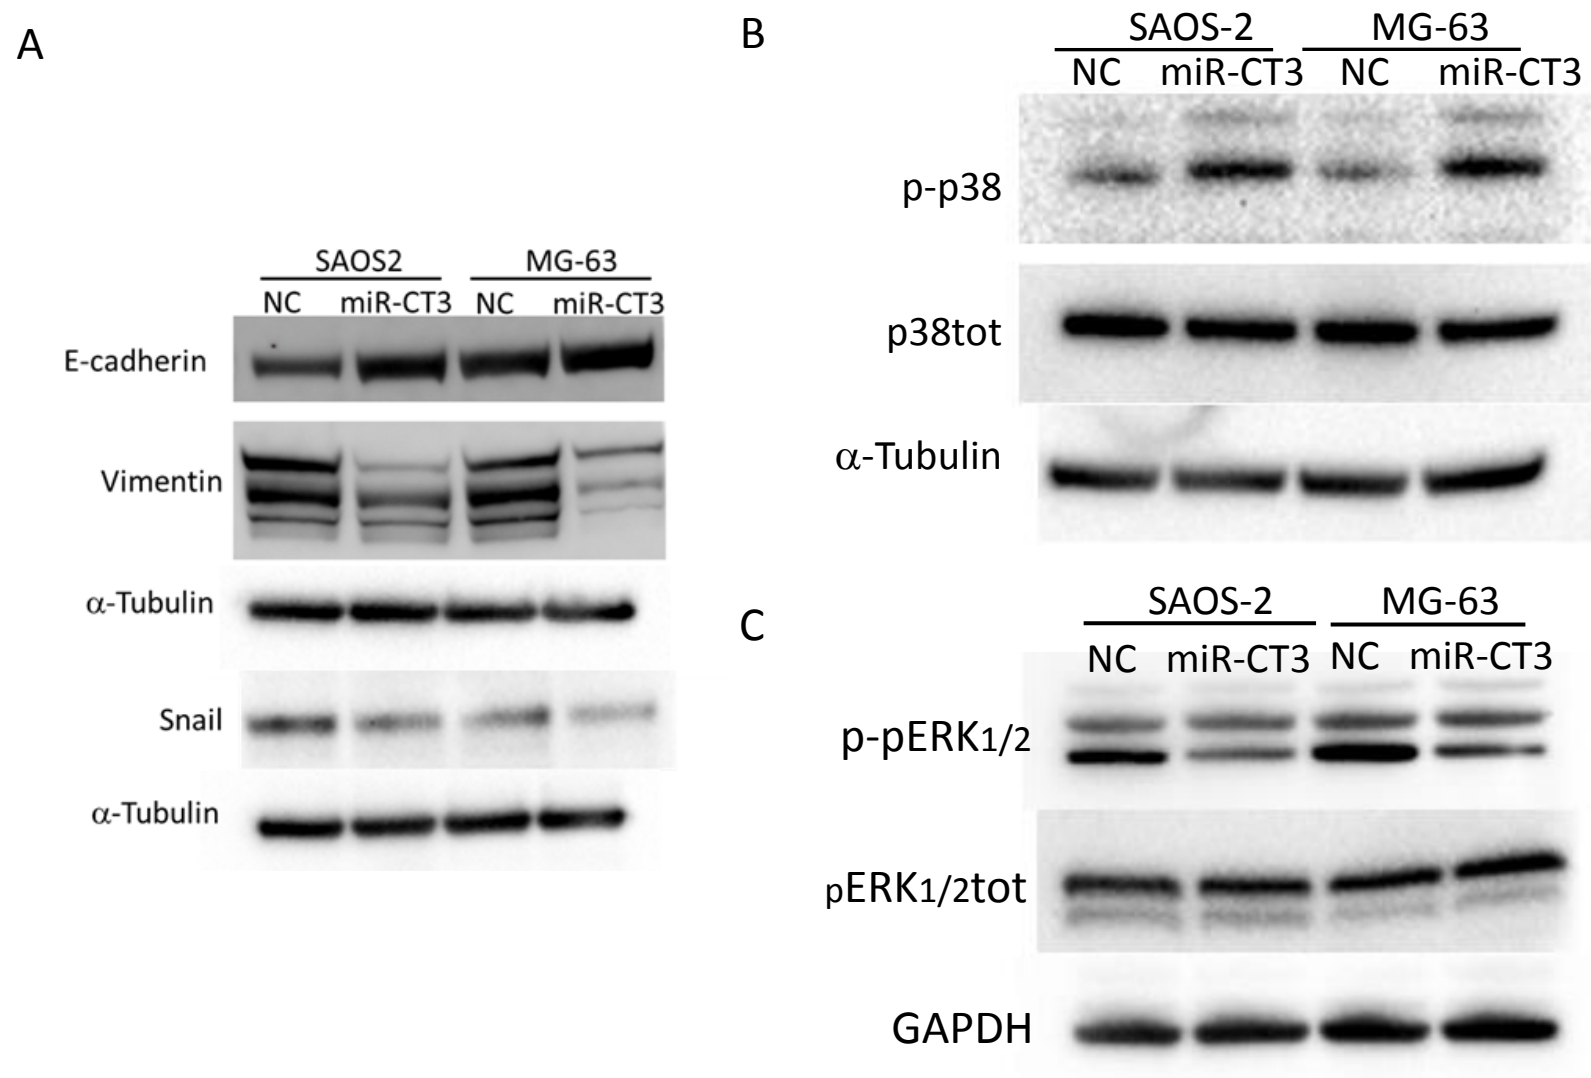

**Figure 6. miR-CT3 over-expression reduces the expression of proteins of the EMT-pathway**

A. Western blotting analysis of E-cadherin, Vimentin, Snail in SAOS-2 and MG-63 cells transfected with miR-CT3 mimics and negative control (NC) for 24 hours. Tubulin was used as loading control. B. Western blotting analysis of phospho- and total-p38 MAPK in SAOS-2 and MG-63 cells transfected with miR-CT3 mimics and negative control (NC) for 24 hours. Tubulin was used as loading control. C. Western blotting analysis of phospho- and total-p42/44 ERK in SAOS-2 and MG-63 cells transfected with miR-CT3 mimics and negative control (NC) for 24 hours. GAPDH was used as loading control.
