# Supplementary material for: Potential Anti-Metastatic Role of the Novel miR-CT3 in Tumor Angiogenesis and Osteosarcoma Invasion
Source: MDPI journal article supplement (doi:10.3390/ijms23020705), 2022-01-09
Supplement: s1 [file s1]

**Figure S3**

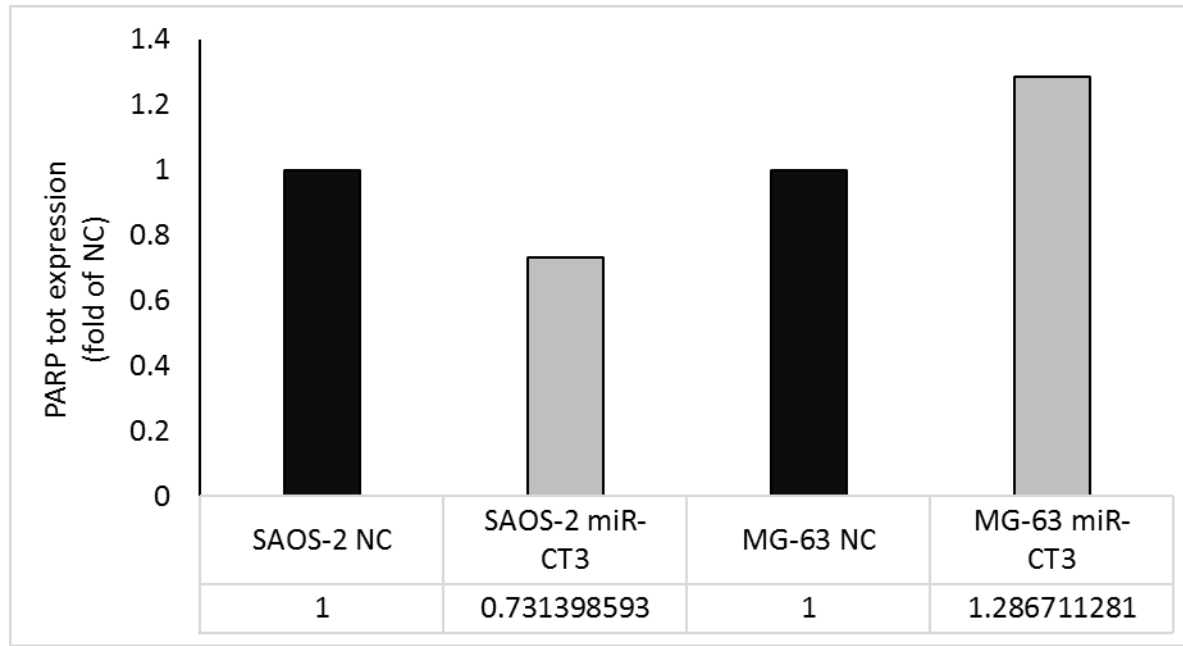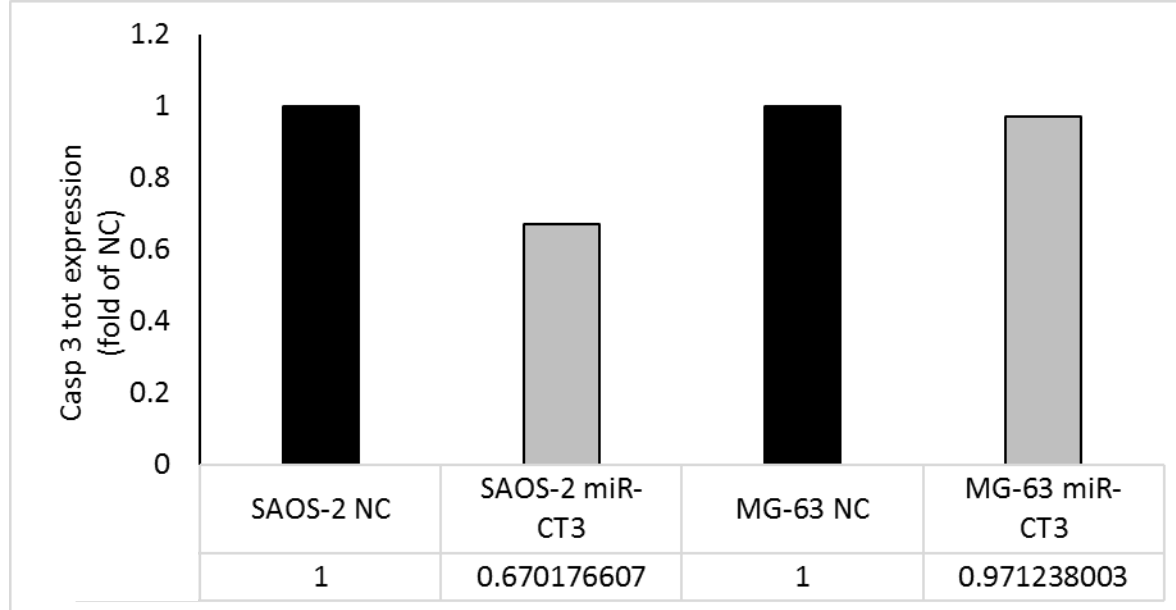

**Densitometry analysis of western blotting of Figure 4C**  
Densitometry values (normalized to  $\alpha$ -tubulin) of Parp tot and Casp3 tot.
