# Supplementary material for: Potential Anti-Metastatic Role of the Novel miR-CT3 in Tumor Angiogenesis and Osteosarcoma Invasion
Source: MDPI journal article supplement (doi:10.3390/ijms23020705), 2022-01-09
Supplement: s1 [file s1]

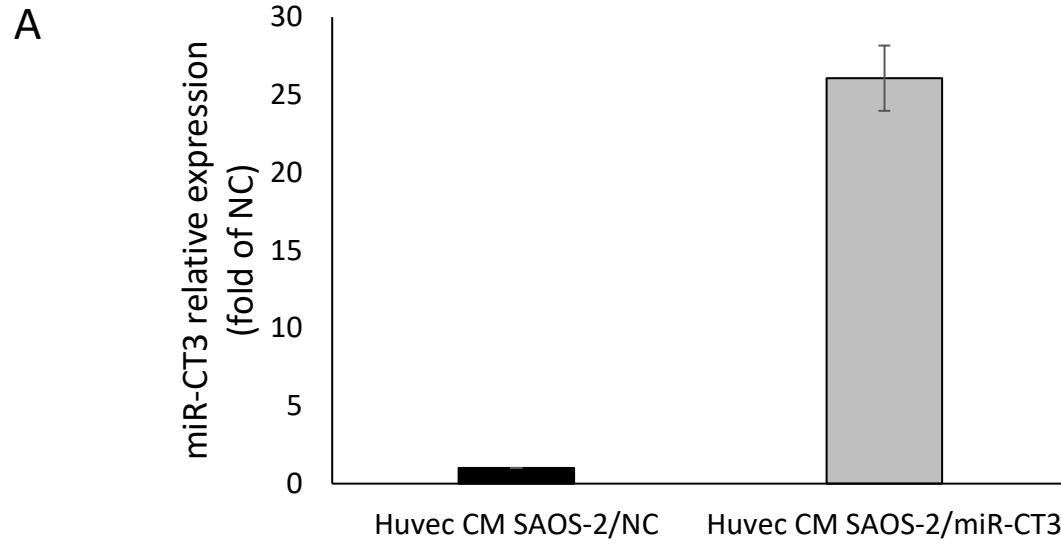

**SF3 A. miR-CT3 expression in Huvec cells treated with the conditioned medium of SAOS-2 cells trasfected with miR-CT3 mimic or NC**

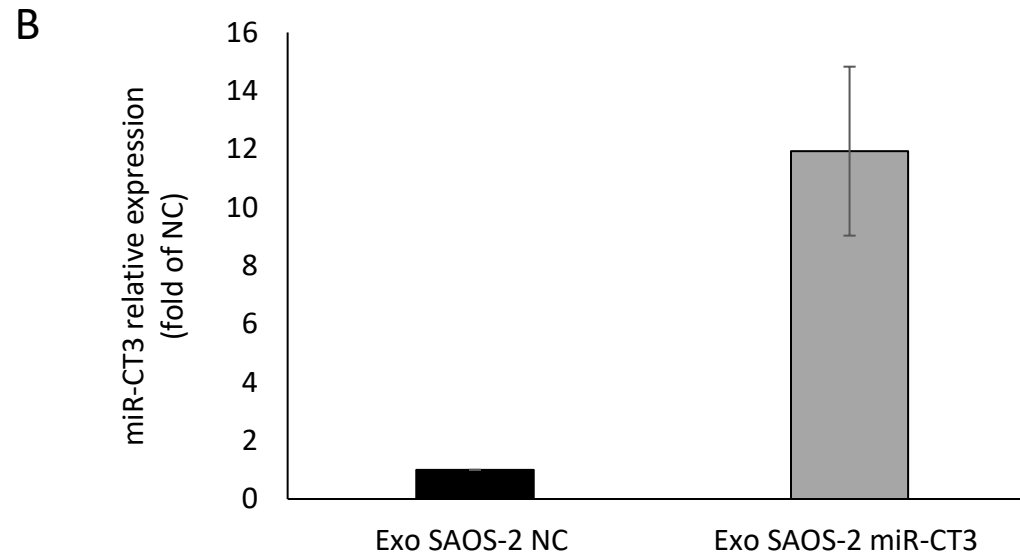

**SF3 B. miR-CT3 expression in exosomes derived from SAOS-2 cells trasfected with miR-CT3 mimic or NC**
