# Supplementary material for: Potential Anti-Metastatic Role of the Novel miR-CT3 in Tumor Angiogenesis and Osteosarcoma Invasion
Source: MDPI journal article supplement (doi:10.3390/ijms23020705), 2022-01-09
Supplement: s1 [file s1]

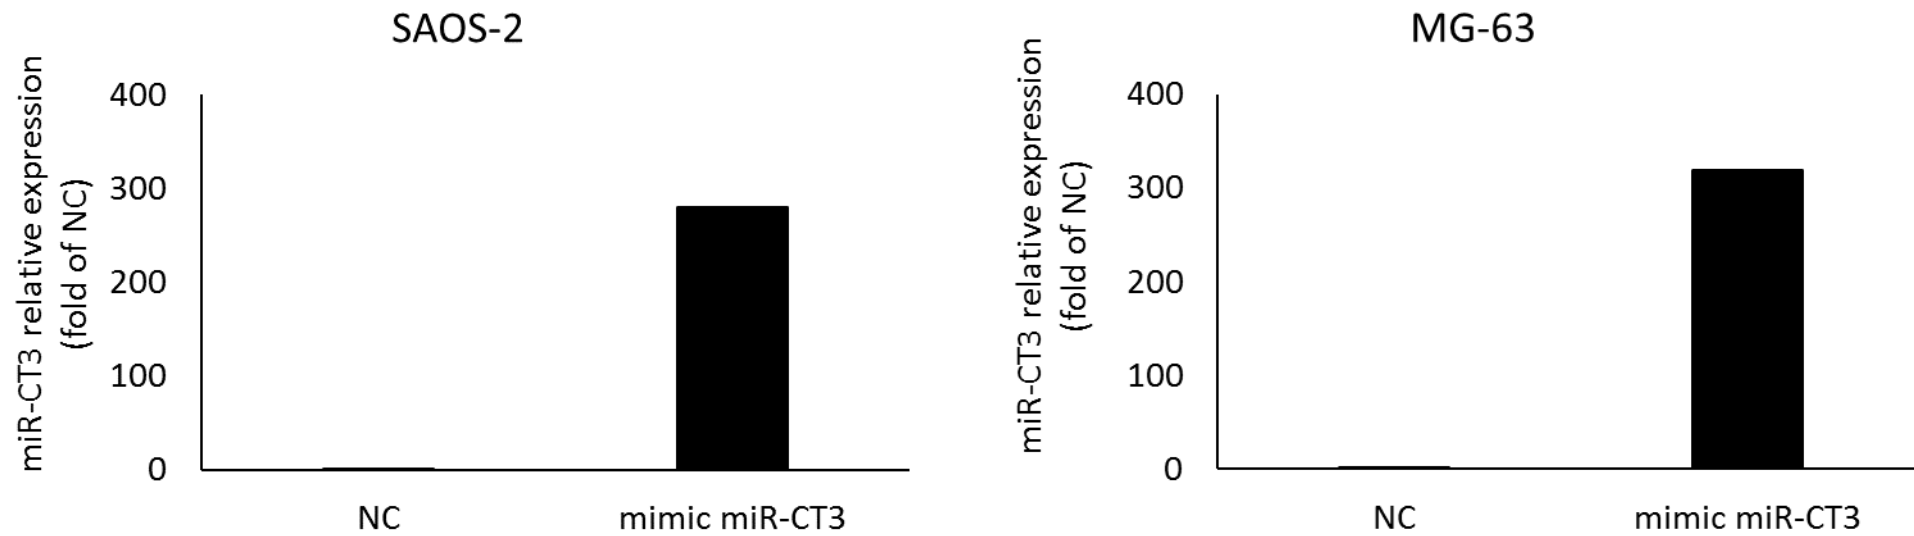

**Figure S1.**

miR-CT3 over-expression in OS cells (SAOS-2 and MG-63) transfected with miR-CT3 mimics negative control (NC). Values are expressed as fold of control (NC).
